# Supplementary material
Source: Springer Nature journal article supplement (https://www.springermedizin.de/resource/supplementary/12913_2013_3141_MOESM1_ESM.pdf/9532486)
Supplement: MOESM1 [file 9532486]

district/h  
ealth  
facility ... j

```
graph TD; A["district/h ealth facility ... j"] --- B["woman 1"]; A --- C["woman 2"]; A --- D["woman ... i"]
```

woman 1

woman 2

woman ... i
